# Supplementary material for: Risk of hypoglycaemia with insulin degludec versus insulin glargine U300 in insulin-treated patients with type 2 diabetes: the randomised, head-to-head CONCLUDE trial
Source: Springer Nature journal article supplement (doi:10.1007/s00125-019-05080-9), 2020-01-27
Supplement: MOESM1 [file 17599786]

## Supplementary appendix

### **Risk of hypoglycaemia with insulin degludec versus insulin glargine U300 in insulin-treated patients with type 2 diabetes: the randomised, head-to-head CONCLUDE trial**

Athena Philis-Tsimikas, David C. Klonoff, Kamlesh Khunti, Harpreet S. Bajaj, Lawrence A. Leiter, Melissa Voigt Hansen, Lone Nørgård Troelsen, Steen Ladelund, Simon Heller, Thomas R. Pieber, on behalf of the CONCLUDE Study Group.

#### Contents

|                                                                                                      |   |
|------------------------------------------------------------------------------------------------------|---|
| ESM Table 1: Baseline characteristics of participants entering the maintenance period .....          | 2 |
| ESM Table 2. Sensitivity analyses of hypoglycaemic endpoints .....                                   | 4 |
| ESM Table 3. Sensitivity analysis of glycaemic endpoints to control for variation across sites ..... | 5 |
| ESM Table 4: Treatment-emergent adverse events (total treatment period) .....                        | 6 |
| ESM Fig. 1: Trial design .....                                                                       | 7 |

**ESM Table 1: Baseline characteristics of participants entering the maintenance period**

|                                                                                  | <b>Degludec U200<br/>(N=758)</b> | <b>Glargine U300<br/>(N=759)</b> | <b>p-value<sup>e</sup></b> |
|----------------------------------------------------------------------------------|----------------------------------|----------------------------------|----------------------------|
| Age (years)                                                                      | 62.7 ± 10.0                      | 62.6 ± 10.0                      | 0.7994                     |
| Men                                                                              | 443 (58.4)                       | 409 (53.9)                       | 0.0786                     |
| Ethnicity                                                                        |                                  |                                  | 0.2557                     |
| Hispanic or Latino                                                               | 78 (10.3)                        | 93 (12.3)                        |                            |
| Race                                                                             |                                  |                                  | 0.7417                     |
| White                                                                            | 656 (86.5)                       | 662 (87.2)                       |                            |
| Black or African American                                                        | 70 (9.2)                         | 61 (8.0)                         |                            |
| Asian                                                                            | 23 (3.0)                         | 26 (3.4)                         |                            |
| Other                                                                            | 9 (1.2)                          | 10 (1.3)                         |                            |
| Diabetes duration (years)                                                        | 15.0 ± 8.1                       | 14.8 ± 8.2                       | 0.6597                     |
| Oral antihyperglycaemic treatment <sup>a</sup>                                   | 671 (88.5)                       | 668 (88.0)                       | 0.5872                     |
| Metformin                                                                        | 587 (77.4)                       | 594 (78.3)                       |                            |
| Dipeptidyl-peptidase-4 inhibitors                                                | 169 (22.3)                       | 141 (18.6)                       |                            |
| SGLT-2 inhibitors                                                                | 144 (19.0)                       | 147 (19.4)                       |                            |
| Combinations of antihyperglycaemic treatments <sup>b</sup>                       | 38 (5.0)                         | 39 (5.1)                         |                            |
| Thiazolidinedione                                                                | 34 (4.5)                         | 23 (3.0)                         |                            |
| Alpha-glucosidase inhibitors                                                     | 3 (0.4)                          | 2 (0.3)                          |                            |
| Basal insulin                                                                    | 756 (99.7) <sup>c</sup>          | 759 (100.0)                      | 0.1080                     |
| Detemir                                                                          | 162 (21.4)                       | 131 (17.3)                       |                            |
| Glargine U100                                                                    | 474 (62.5)                       | 508 (66.9)                       |                            |
| NPH insulin                                                                      | 120 (15.8)                       | 120 (15.8)                       |                            |
| Basal insulin dose (U)                                                           | 42.2 ± 28.5                      | 41.8 ± 29.0                      | 0.7913                     |
| Body weight (kg)                                                                 | 91.6 ± 17.9                      | 90.7 ± 17.9                      | 0.3008                     |
| BMI (kg/m <sup>2</sup> )                                                         | 31.7 ± 5.2                       | 31.5 ± 5.2                       | 0.5408                     |
| HbA <sub>1c</sub> (%)                                                            | 7.5 ± 1.0                        | 7.6 ± 0.9                        | 0.5523                     |
| HbA <sub>1c</sub> (mmol/mol)                                                     | 58.9 ± 10.8                      | 59.2 ± 10.1                      | 0.5523                     |
| FPG (mmol/l)                                                                     | 7.9 ± 2.6                        | 7.9 ± 2.6                        | 0.7102                     |
| eGFR (ml min <sup>-1</sup> [1.73 m] <sup>2</sup> ) based on CKD-EPI <sup>d</sup> | 79.2 ± 20.9                      | 80.3 ± 20.5                      | 0.2703                     |
| Participants with hypoglycaemia risk inclusion criteria                          |                                  |                                  | –                          |
| Fulfilling ≥1 of the following criteria                                          | 546 (72.0)                       | 515 (67.9)                       |                            |
| ≥1 severe hypoglycaemic event within the last year                               | 48 (6.3)                         | 47 (6.2)                         |                            |
| Moderate chronic renal failure                                                   | 135 (17.8)                       | 120 (15.8)                       |                            |

|                                          |            |            |  |
|------------------------------------------|------------|------------|--|
| Hypoglycaemia symptom unawareness        | 157 (20.7) | 132 (17.4) |  |
| Exposed to insulin for $\geq 5$ years    | 379 (50.0) | 364 (48.0) |  |
| Hypoglycaemic event within last 12 weeks | 446 (58.8) | 456 (60.1) |  |

Data are for the full analysis set. Data listed are number (proportion [%]) or mean  $\pm$  standard deviation. Percentage refers to the proportion of participants on degludec U200 or glargine U300 treatment.

<sup>a</sup>One participant on sulfonylurea was randomised in error and discontinued treatment.

<sup>b</sup>The combinations of antihyperglycaemic treatments includes allowed combinations, as per the inclusion criteria, only.

<sup>c</sup>One participant who was on premix NPH insulin and one participant who was insulin-naive were randomised in error.

<sup>d</sup>Taken at screening.

<sup>e</sup>Two-sided test of no difference.

CKD-EPI, Chronic Kidney Disease Epidemiology Collaboration; FPG, fasting plasma glucose; glargine U100, insulin glargine 100 units/ml; glargine U300, insulin glargine 300 units/ml; NPH, neutral protamine Hagedorn; SGLT-2, sodium-glucose co-transporter-2.

**ESM Table 2. Sensitivity analyses of hypoglycaemic endpoints**

| <b>Without imputed data</b>             | <b>Rate ratio (95% CI)</b> |
|-----------------------------------------|----------------------------|
| Overall symptomatic hypoglycaemia       | 0.82 (0.67, 1.00)          |
| Nocturnal symptomatic hypoglycaemia     | 0.63 (0.47, 0.84)          |
| Severe hypoglycaemia                    | 0.20 (0.07, 0.59)          |
| <b>Capped at 3 hypoglycaemic events</b> | <b>Rate ratio (95% CI)</b> |
| Overall symptomatic hypoglycaemia       | 0.89 (0.77, 1.03)          |
| Nocturnal symptomatic hypoglycaemia     | 0.63 (0.49, 0.81)          |
| Severe hypoglycaemia                    | 0.21 (0.07, 0.58)          |

Overall symptomatic: severe or blood glucose (<3.1 mmol/l)-confirmed with symptoms.  
Nocturnal symptomatic: severe or blood glucose (<3.1 mmol/l)-confirmed with symptoms, occurring between 00:01 and 05:59. Severe: an event requiring third party assistance as per the American Diabetes Association definition.

**ESM Table 3. Sensitivity analysis of glycaemic endpoints to control for variation across sites**

|                              | <b>Treatment difference (95% CI)</b> |
|------------------------------|--------------------------------------|
| HbA <sub>1c</sub> (%)        | -0.10 (-0.17, -0.02)                 |
| HbA <sub>1c</sub> (mmol/mol) | -1.05 (-1.89, -0.21)                 |
| FPG (mmol/l)                 | -0.62 (-0.80, -0.44)                 |

FPG, fasting plasma glucose.

**ESM Table 4: Treatment-emergent adverse events (total treatment period)**

|                                                  | Degludec U200<br>(N=802)<br>PYE=1115.7 |      |        |       | Glargine U300<br>(N=798)<br>PYE=1112.7 |      |        |       |
|--------------------------------------------------|----------------------------------------|------|--------|-------|----------------------------------------|------|--------|-------|
|                                                  | <i>n</i>                               | %    | Events | Rate  | <i>n</i>                               | %    | Events | Rate  |
| Adverse events                                   | 683                                    | 85.2 | 4098   | 367.3 | 650                                    | 81.5 | 4066   | 365.4 |
| Serious adverse events                           | 167                                    | 20.8 | 305    | 27.3  | 141                                    | 17.7 | 286    | 25.7  |
| Severe adverse events                            | 123                                    | 15.3 | 218    | 19.5  | 120                                    | 15.0 | 220    | 19.8  |
| Adverse events probably related to trial product | 55                                     | 6.9  | 78     | 7.0   | 55                                     | 6.9  | 67     | 6.0   |
| Fatal events                                     | 7                                      | 0.9  | 9      | 0.8   | 6                                      | 0.8  | 8      | 0.7   |

Data are for the safety analysis set.

%, proportion of participants with events; glargine U300, insulin glargine 300 units/ml; *n*, number of participants with events; PYE, patient-years of exposure; rate, events per 100 patient-years of exposure.

ESM Fig. 1: Trial design

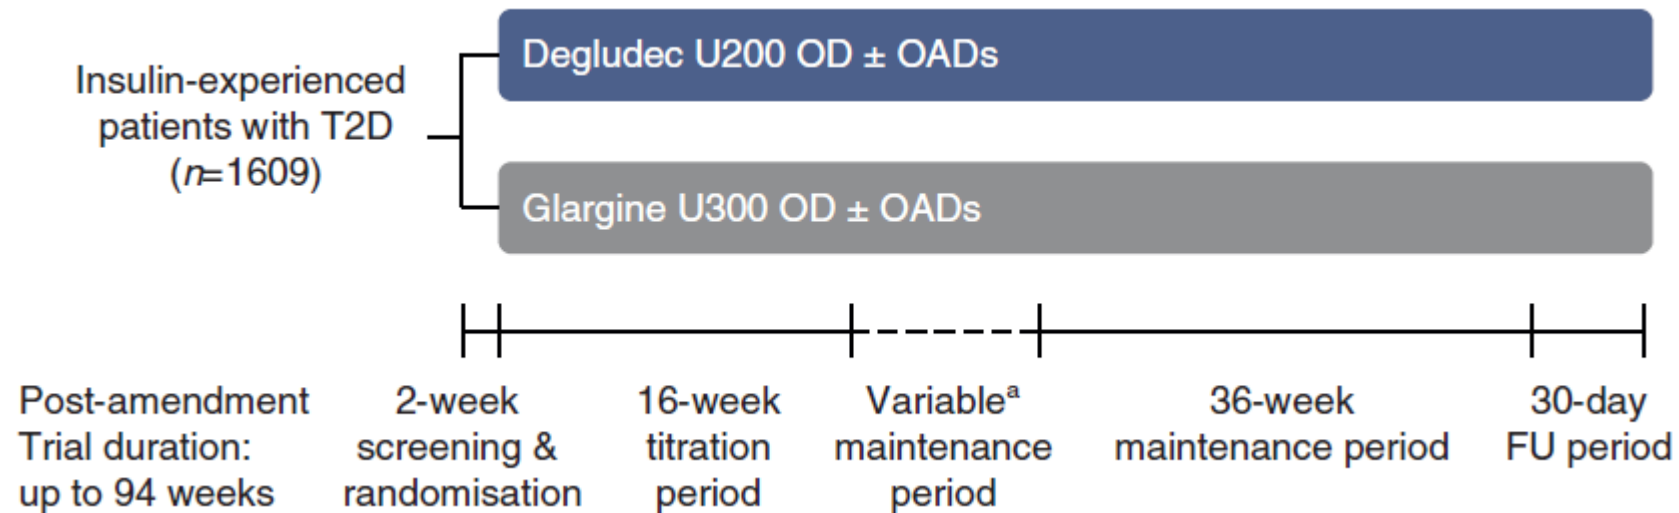

<sup>a</sup>Routine medical monitoring activities during the trial revealed an unusual and potentially unsafe reporting pattern of glycaemic levels and hypoglycaemic events. The data indicated that these patterns were related to the glycaemic data collection system (MyGlucoHealth blood glucose meter and an electronic diary). A major protocol amendment was implemented to discontinue and replace the glycaemic data collection system. At the time of the amendment, recruitment had been finalised and all participants on-treatment had completed the titration period. The duration of the variable maintenance period was dependent on each participant's individual randomisation date and/or approval of the amended protocol by health authorities and local ethics committees, if applicable. After implementation of the amended protocol, participants were asked to come in and initiate the maintenance period as soon as the resources were available at the trial site irrespective of the next planned visit, whereby all participants received a standard Abbott blood glucose meter and paper diary to be used for the remainder of the trial. Thus, all participants were not required to have all visits scheduled between weeks 16 and 52.

FU, follow-up; glargine U300, insulin glargine 300 units/ml; OAD, oral glucose-lowering drug; OD, once daily; T2D, type 2 diabetes.
